# Supplementary material
Source: PubMed Central journal article supplement (PMC7933783)
Supplement: mmc1.pdf [file mmc1.pdf]

# Urine Proteome of COVID-19 Patients

## Supplemental Figures and Legends

### Demographics of Healthy controls and COVID-19 patients

| Variables         | Healthy Control (n=32) | COVID-19       |                |
|-------------------|------------------------|----------------|----------------|
|                   |                        | Mild (n=3)     | Severe (n=3)   |
| <b>Sex - no.</b>  |                        |                |                |
| Male              | 21                     | 2              | 2              |
| Female            | 11                     | 1              | 1              |
| <b>Age - year</b> |                        |                |                |
| Mean $\pm$ SD     | 29.1 $\pm$ 4.9         | 64.0 $\pm$ 1.6 | 70.3 $\pm$ 8.2 |
| Range             | 22.0-39.0              | 62.0-64.0      | 59.0-78.0      |

**Figure S1.** Demographics of the Health controls group (n=32) and COVID-19 patients (n=6).

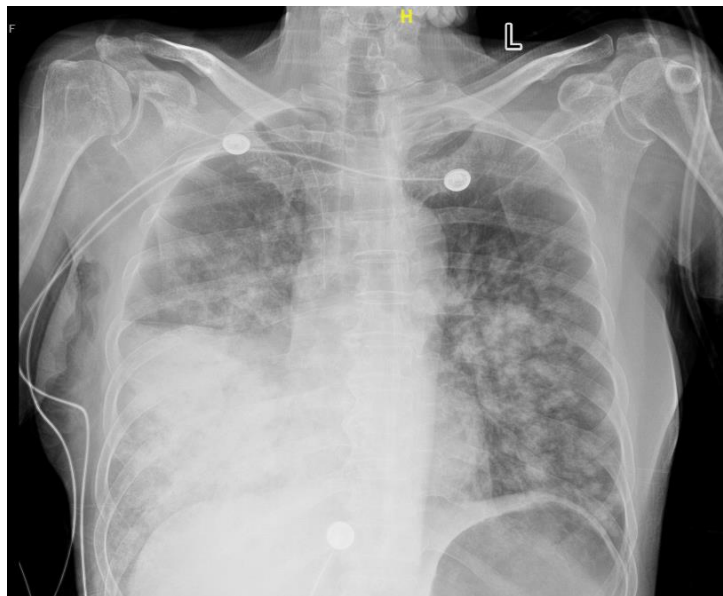

**Figure S2.** Chest radiograph of patient 4 (P4) with multiple metastases of colon cancer. This photo was taken on February 27, 2020.

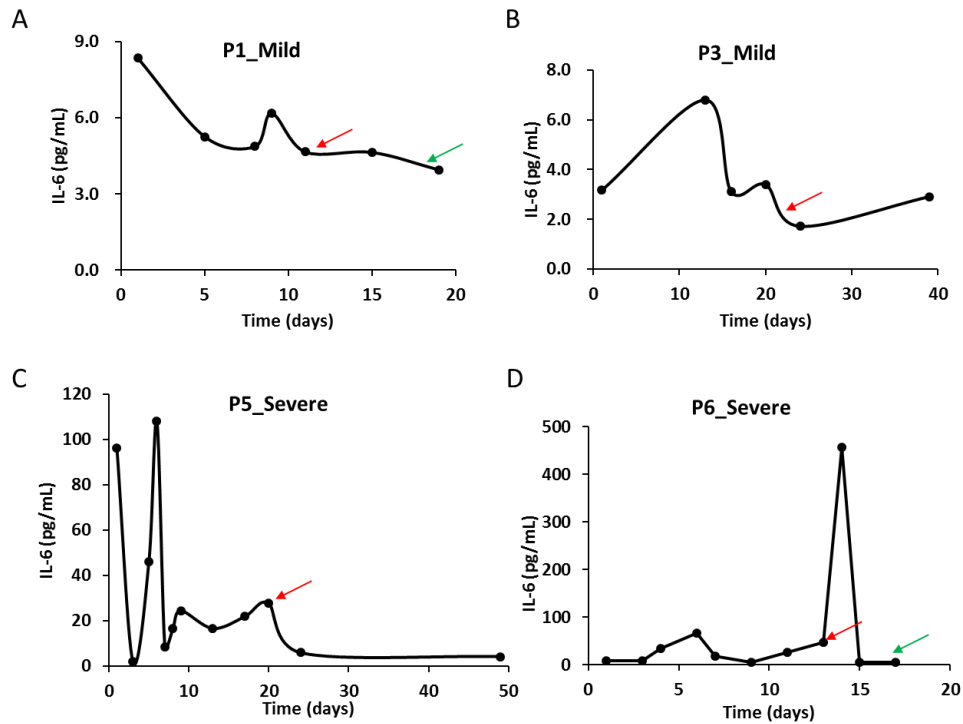

**Figure S3.** Concentration distribution of interleukin 6 (IL-6) in the blood of COVID-19 patient number 1 (A), 3 (B), 5 (C) and 6 (D). The time that the COVID-19 blood was detected for the first time was defined as the first day. The red arrows indicated the collection time of the urine. The green arrows in P1 and P6 indicated the collection time from the recovery stage.

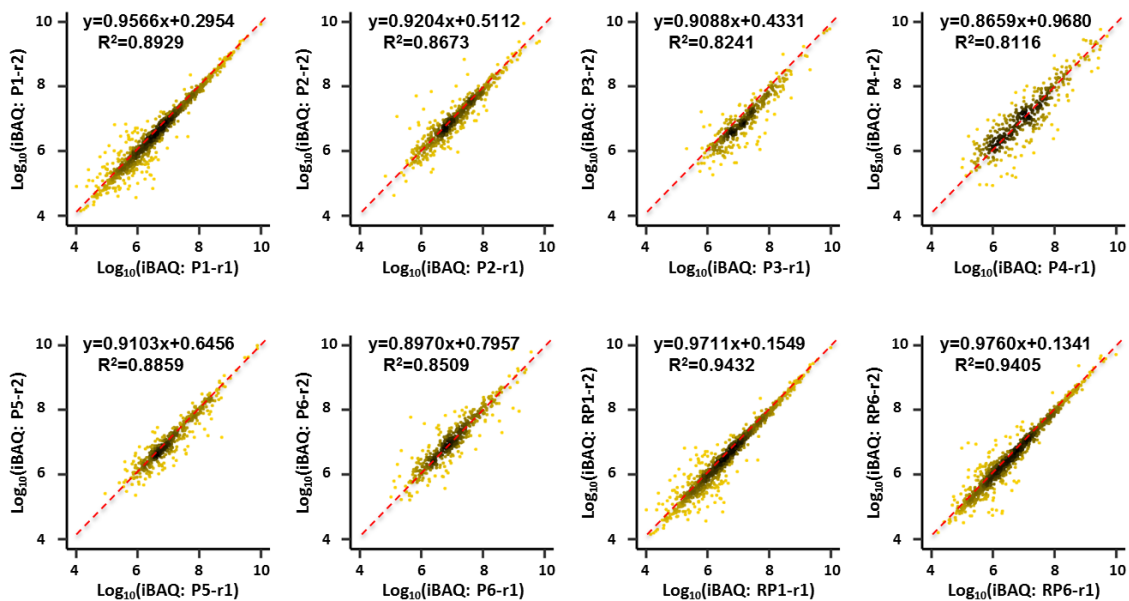

**Figure S4.** Quality control of proteomic data. Correlation analysis of technical replicates of every COVID-19 patient and rehabilitation patient sample.

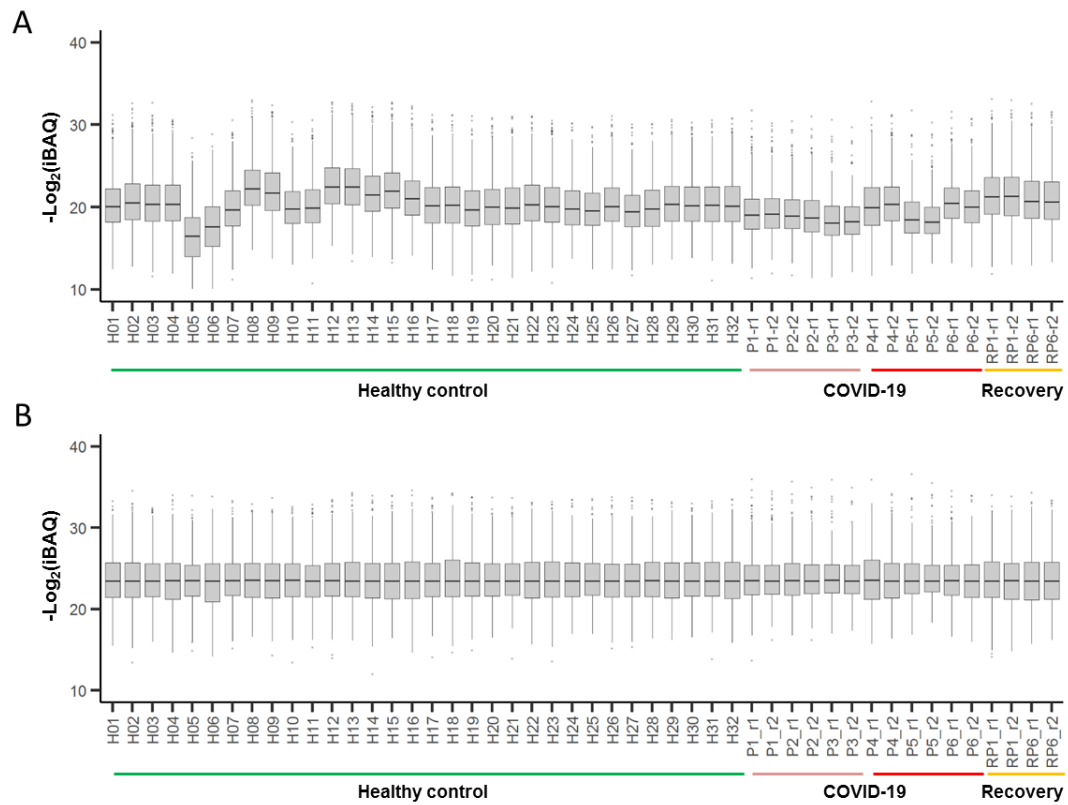

**Figure S5.** Normalization of proteomic data. (A&B): The distribution of iBAQ values before (A) and after (B) normalization based on the iBAQ median values in each sample.

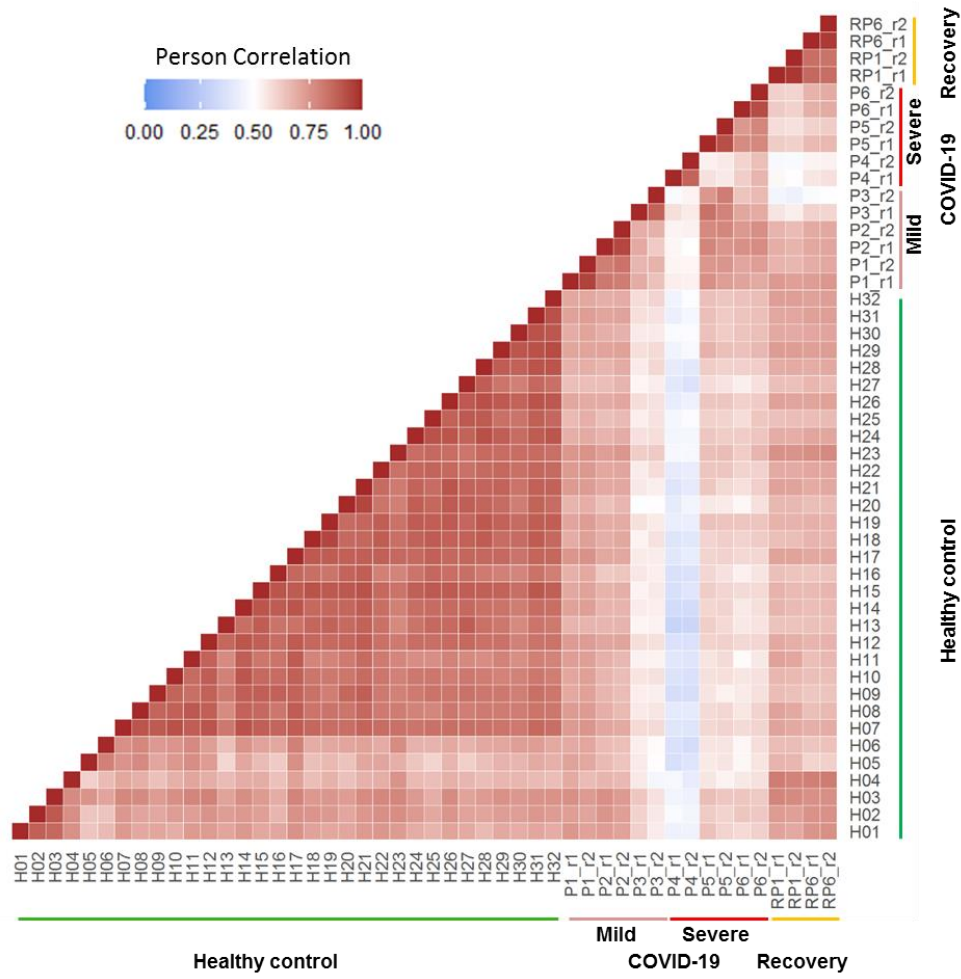

Figure S6. The correlation analysis of iBAQ values among each sample.

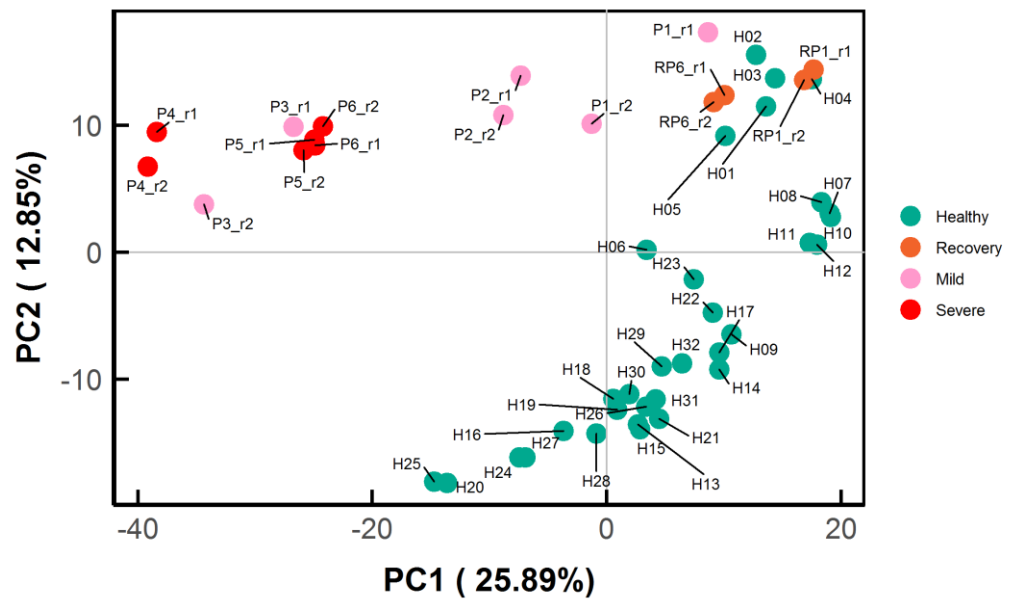

Figure S7. Principal components analysis (PCA) of healthy volunteers, COVID-19 patients and recovery patients in proteomic features.

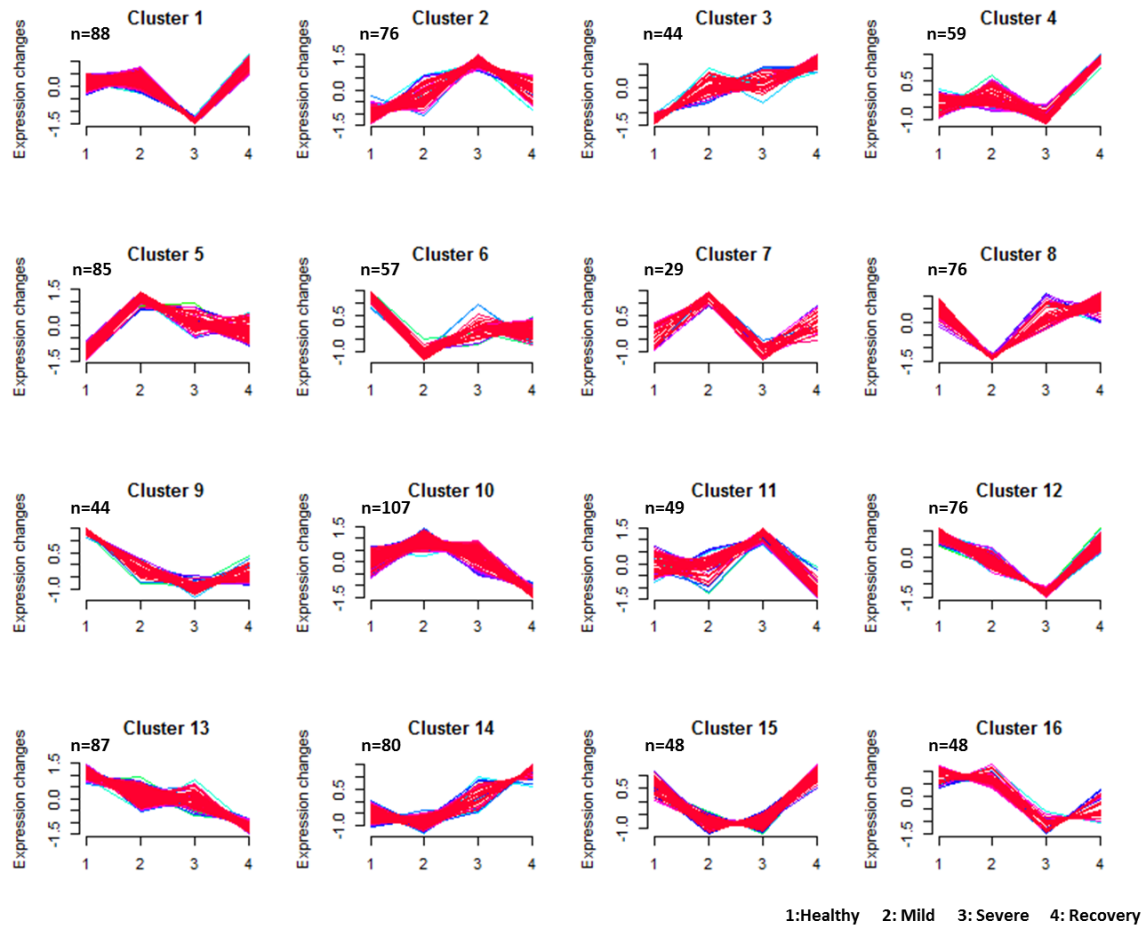

**Figure S8.** Clustering of commonly identified proteins illustrated specific clusters of proteins in COVID-19 patients. 1: Health 2: Mild 3: Severe 4: Recovery

## Supplemental Tables

Table S1. Quantified proteins from Healthy control group.

Table S2. Quantified proteins from COVID-19 group.

Table S3. Quantified proteins from Recovery COVID-19 group.

Table S4. Differentially expressed proteins in mild COVID-19 patients

Table S5. Differentially expressed proteins in severe COVID-19 patients

Table S6. Differentially expressed proteins in recovery persons
